# Supplementary material for: Is there scope to improve the selection of patients with alcohol-related liver disease for referral to secondary care? A retrospective analysis of primary care referrals to a UK liver centre, incorporating simple blood tests
Source: PubMed Central journal article supplement (PMC8183275; doi:10.1136/bmjopen-2020-047786), 2021-06-04
Supplement: bmjopen-2020-047786supp001.pdf [file bmjopen-2020-047786supp001.pdf]

**Supplementary Table 1:** Inclusion and exclusion criteria

| Inclusion Criteria                                                                                                                                                                                                                                                                                                                                                                                                                                                                                                                                                                                                                                                                                                                                                                                                                       | Exclusion criteria                                                                                                                                                                                                                                                                                                                          |
|------------------------------------------------------------------------------------------------------------------------------------------------------------------------------------------------------------------------------------------------------------------------------------------------------------------------------------------------------------------------------------------------------------------------------------------------------------------------------------------------------------------------------------------------------------------------------------------------------------------------------------------------------------------------------------------------------------------------------------------------------------------------------------------------------------------------------------------|---------------------------------------------------------------------------------------------------------------------------------------------------------------------------------------------------------------------------------------------------------------------------------------------------------------------------------------------|
| <ul style="list-style-type: none"> <li>○ Age 18 or above</li> <br/> <li>○ Presence of new referral letter from GP to hepatology clinic at Royal Free during evaluation period Jan 2015 to Jan 2018</li> <br/> <li>○ Primary reason for referral from GP to hepatologist is suspected diagnosis of ArLD\$ or suspected diagnosis of NAFLD^</li> </ul>                                                                                                                                                                                                                                                                                                                                                                                                                                                                                     | <ul style="list-style-type: none"> <li>○ Presence of pre-existing hepatological diagnosis (Including but not limited to: auto-immune hepatitis, viral hepatitis, PBC, PSC, HCC),</li> <br/> <li>○ Patients are already under the care of a hepatologist/Gastroenterologist for investigation or management of a liver condition.</li> </ul> |
| <p data-bbox="245 1167 1098 1301">\$ ‘Suspected ArLD’ referrals were defined as those in which the GP referral letter requested an assessment by a liver specialist specifying concerns about suspected ArLD or expressing concerns about a patient’s alcohol intake.</p> <p data-bbox="245 1335 1098 1599">^ ‘Suspected NAFLD’ referrals were defined as those in which the GP referral letter either specified that they were referring the patient to hepatology ‘with suspected NAFLD’ or ‘on the local NAFLD referral pathway’, OR, in the absence of any other cause of liver dysfunction, where the GP specified that the patient had steatosis or chronic liver disease on ultrasound in combination with mentioning metabolic risk factors (BMI ≥25, diabetes, high waist circumference, high cholesterol or hypertension).</p> |                                                                                                                                                                                                                                                                                                                                             |

**Supplementary table 2:** Demographics within each re-classified aetiology group

| <b>Overall characteristics<br/>(n=762)</b>        | <b>ArLD<br/>(n =79)</b> | <b>NAFLD<br/>(n=451)</b> | <b>BAFLD<br/>(n=232)</b> |                  |
|---------------------------------------------------|-------------------------|--------------------------|--------------------------|------------------|
| <b>Non advanced fibrosis (&lt;F3) n (%)</b>       | 46/78 (60)              | 377/450 (83.8)           | 165/230 (71.7)           | <i>p</i> <0.001  |
| <b>Advanced fibrosis (≥F3) n (%)</b>              | 32/78 (40)              | 73/450 (16.2)            | 65/230 (28.3)            |                  |
| <b>Age (mean; sd)</b>                             | 51.85 ± 13.1            | 55.3 ± 14.07             | 57.2 ± 12.3              | <i>p</i> = 0.009 |
| <b>BMI (mean; sd)</b>                             | 21.9 ± 2.32             | 32.1 ± 6.17              | 30.6 ± 5.03              | <i>p</i> <0.001  |
| <b>&gt; 25 n (%)</b>                              | 0/59 (0)                | 393/443 (88.7)           | 215/230 (93.3)           | <i>p</i> <0.001  |
| <b>&gt; 30 n (%)</b>                              | 0/57 (0)                | 252/416 (60.6)           | 98/202 (48.5)            | <i>p</i> <0.001  |
| <b>Alcohol intake median U/w<br/>(IQR)</b>        | 79.9<br>(49.3-140)      | 0<br>(0-4)               | 49.5<br>(30-88.5)        | <i>p</i> <0.001  |
| <b>N=</b>                                         | 76                      | 434                      | 228                      |                  |
| <b>Years of harmful drinking<br/>Median (IQR)</b> | 13 (5-20)               | 0 (0-0)                  | 20 (8-30)                | <i>p</i> <0.001  |
| <b>N=</b>                                         | 47                      | 427                      | 124                      |                  |
| <b>ALT median, (IQR)</b>                          | 43 (28-68)              | 45 (31-68.25)            | 47 (30-67)               | <i>p</i> =0.752  |
| <b>N=</b>                                         | 79                      | n 450                    | 232                      |                  |
| <b>Community ELF score<br/>(mean, sd)</b>         | 9.96 ± 0.42             | 10.33 ± 0.74             | 10.5 ± 0.84              | <i>p</i> = 0.215 |
| <b>N=</b>                                         | 7                       | 169                      | 54                       |                  |
| <b>Community FIB4<br/>median</b>                  | 2.75                    | 1.56                     | 2.2                      | <i>p</i> =0.043  |
| <b>(IQR)</b>                                      | (1.22-5.19)             | (1.38 -2.2)              | (1.5-3.25)               |                  |
| <b>N=</b>                                         | 4                       | 75                       | 24                       |                  |

ArLD = Alcohol-related Liver Disease, NAFLD = Non-Alcoholic-Fatty-Liver-Disease, BAFLD = Both Alcohol and Fatty Liver Disease, sd = standard deviation, BMI = Body Mass Index, IQR = interquartile range, ALT = alanine aminotransferase, ELF = Enhanced Liver Fibrosis score
